# Supplementary material
Source: publisher figshare collection journal article supplement (https://brill.figshare.com/ndownloader/files/24613589)
Supplement: Supplementary file 1 [file 24613589]

**Appendix One**

President’s Ocean Policy Statement, March 10, 1983

The United States has long been a leader in developing customary and conventional law of the sea. Our objectives have consistently been to provide a legal order that will, among other things, facilitate peaceful, international uses of the oceans and provide for equitable and effective management and conservation of marine resources. The United States also recognizes that all nations have an interest in these issues.

Last July I announced that the United States will not sign the United Nations Law of the Sea Convention that was opened for signature on December 10.[[1]](#footnote-1) We have taken this step because several major problems in the Convention's deep seabed mining provisions are contrary to the interests and principles of industrialized nations and would not help attain the aspirations of developing countries.

The United States does not stand alone in these concerns. Some important allies and friends have not signed the convention.[[2]](#footnote-2) Even some signatory states have raised concerns about these problems.

However, the convention contains provisions with respect to traditional uses of the oceans which generally confirm existing maritime law and practice and fairly balance the interests of all states.

Today I am announcing three decisions to promote and protect the oceans interests of the United States in a manner consistent with those fair and balanced results in the Convention and international law.

First, the United States is prepared to accept and act in accordance with the balance of interests relating to traditional uses of the oceans—such as navigation and overflight. In this respect, the United States will recognize the rights of other states in the waters off their coasts, as reflected in the Convention, so long as the rights and freedoms of the United States and others under international law are recognized by such coastal states.

Second, the United States will exercise and assert its navigation and overflight rights and freedoms on a worldwide basis in a manner that is consistent with the balance of interests reflected in the convention. The United States will not, however, acquiescence in unilateral acts of other states designed to restrict the rights and freedoms of the international community in navigation and overflight and other related high seas uses.

Third, I am proclaiming today an Exclusive Economic Zone in which the United States will exercise sovereign rights in living and nonliving resources within 200 nautical miles of its coast. This will provide United States jurisdiction for mineral resources out to 200 nautical miles that are not on the continental shelf. Recently discovered deposits there could be an important future source of strategic minerals.

Within this Zone all nations will continue to enjoy the high seas rights and freedoms that are not resource related, including the freedoms of navigation and overflight. My proclamation does not change existing United States policies concerning the continental shelf, marine mammals, and fisheries, including highly migratory species of tuna which are not subject to United States jurisdiction.[[3]](#footnote-3) The United States will continue efforts to achieve international management of these species. The proclamation also reinforces this government’s policy of promoting the United States fishing industry.

While international law provides for a right of jurisdiction over marine scientific research within such a zone, the proclamation does not assert this right. I have elected not to do so because of the United States interest in encouraging marine scientific research and avoiding any unnecessary burdens. The United States will nevertheless recognize the right of other coastal states to exercise jurisdiction over marine scientific research within 200 nautical miles of their coasts, if that jurisdiction is exercised in a manner consistent with international law.

The Exclusive Economic Zone established today will also enable the United States to protect the marine environment. In this connection, the United States will continue to work through the International Maritime Organization and other appropriate international organizations to develop uniform international measures for the protection of the marine environment while imposing no unreasonable burdens on commercial shipping.

The policy decisions I am announcing today will not affect the application of existing United States law concerning the high seas or existing authorities of any United States Government agency.

In addition to the above policy steps, the United States will continue to work with other countries to develop a regime, free of unnecessary political and economic restraints, for mining deep seabed minerals beyond national jurisdiction. Deep seabed mining remains a lawful exercise of the freedom of the high seas open to all nations. The United States will continue to allow its firms to explore for and, when the market permits, exploit these resources.

The administration looks forward to working with the Congress on legislation to implement these new policies.

I Public Papers of the Presidents: Ronald Reagan 1983, at 378–379, 22 ILM 464; 77 Am. J. Int’l L. 619 (1983); Dep’t St. Bull., June 1983, at 70–71, *available at* <https://www.un.org/Depts/los/LEGISLATIONANDTREATIES/PDFFILES/USA_1983_Statement.pdf>.

1. 2 Public Papers of the Presidents: Ronald Reagan 1982, at 911–912. [↑](#footnote-ref-1)
2. Germany, United Kingdom, Israel, Turkey, Ecuador, Peru, and Venezuela, among others, declined to sign the LOS Convention. [↑](#footnote-ref-2)
3. Effective January 1, 1992, the United States commenced exercising jurisdiction over tuna in the US EEZ. 16 U.S. Code § 1812, as amended by Pub.L. 101–627. [↑](#footnote-ref-3)
